# Supplementary material
Source: PubMed Central journal article supplement (PMC5346023)
Supplement: NIHMS720724-supplement-Supp_FigureS1-S9.pdf [file NIHMS720724-supplement-Supp_FigureS1-S9.pdf]

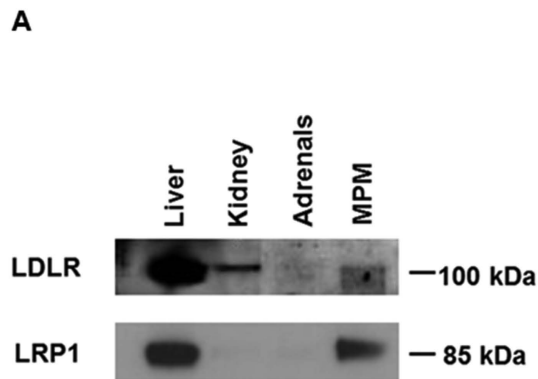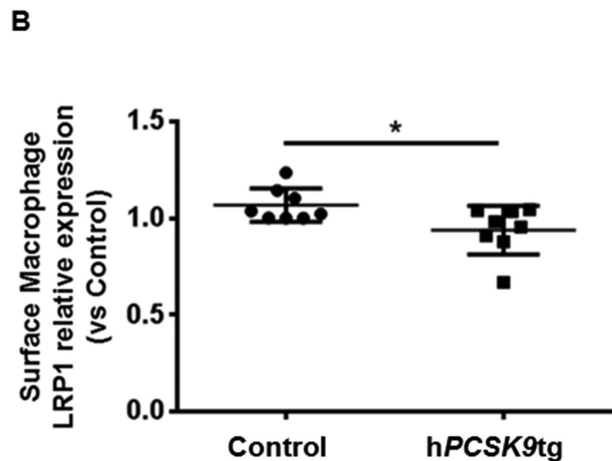

**Supplementary Figure 1.** (A) Immunoprecipitation of *hPCSK9* in liver, kidney, adrenals and MPM collected from *hPCSK9tg* mice and relative western blot analysis of LDLR and LRP1 (B) Flow cytometry analysis of surface LRP1 levels in MPM from *apoE<sup>-/-</sup>* or *hPCSK9tg/apoE<sup>-/-</sup>* mice.

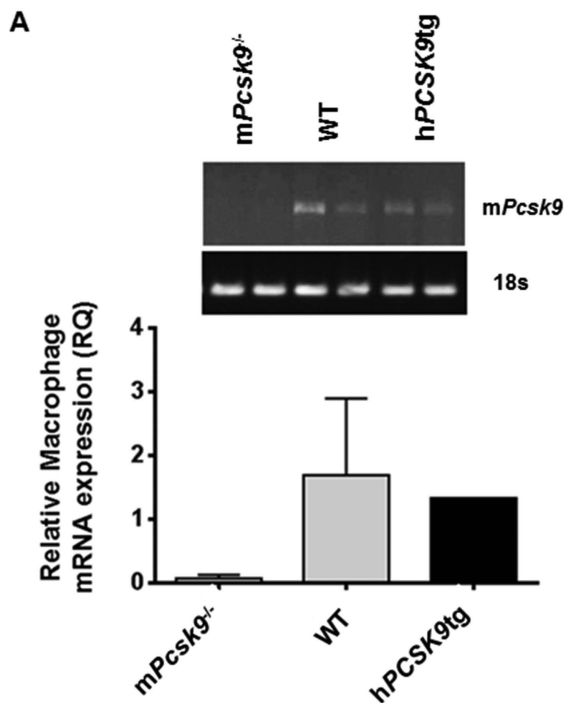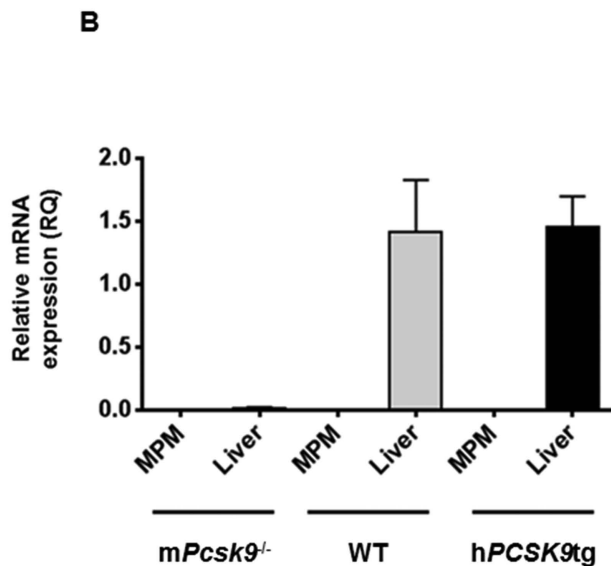

**Supplementary Figure 2.** (A) Relative mRNA levels of *mPcsk9* in MPM from *mPcsk9*<sup>-/-</sup>, WT and *hPcSK9*tg mice, as measured by PCR. (B) Relative mRNA levels of *mPcsk9* in MPM and livers from *mPcsk9*<sup>-/-</sup>, WT and *hPcSK9*tg mice, as measured by QRT-PCR.

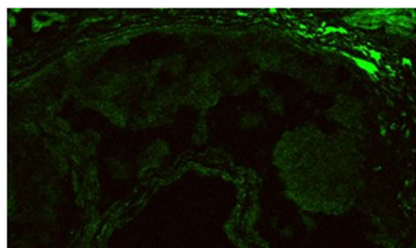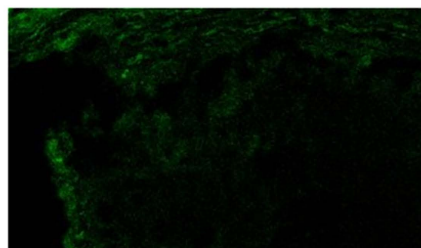

Anti-  
human  
488

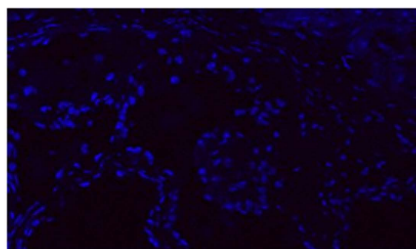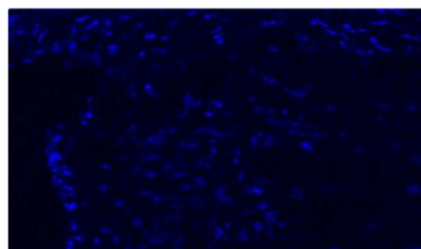

DAPI

$apoE^{-/-} \rightarrow apoE^{-/-}$

$hPCSK9tg/$   
 $apoE^{-/-} \rightarrow apoE^{-/-}$

**Supplementary Figure 3.** Representative images showing negative control staining of lesions of proximal aortas in  $apoE^{-/-} \rightarrow apoE^{-/-}$  or  $hPCSK9tg/apoE^{-/-} \rightarrow apoE^{-/-}$  mice. In green: anti-human secondary antibody staining; in blue: DAPI.

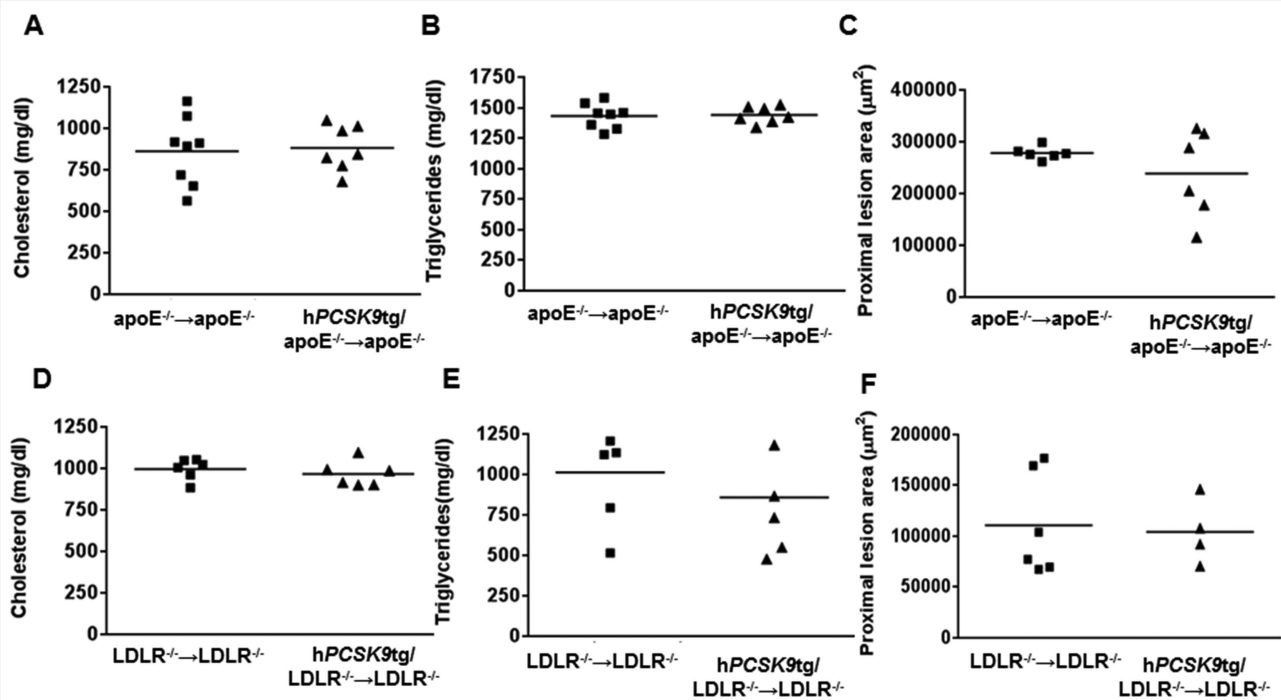

**Supplementary figure 4.** (A) Total serum cholesterol levels measured in apoE<sup>-/-</sup>→apoE<sup>-/-</sup> or hPCSK9tg/apoE<sup>-/-</sup>→apoE<sup>-/-</sup> (B) Serum triglyceride levels measured in apoE<sup>-/-</sup>→apoE<sup>-/-</sup> or hPCSK9tg/apoE<sup>-/-</sup>→apoE<sup>-/-</sup> (C) Quantitation of proximal lesion area in Oil red O stained proximal aortas of apoE<sup>-/-</sup>→apoE<sup>-/-</sup> or hPCSK9tg/apoE<sup>-/-</sup>→apoE<sup>-/-</sup> mice (D) Total serum cholesterol levels measured in LDLR<sup>-/-</sup>→LDLR<sup>-/-</sup> or hPCSK9tg/LDLR<sup>-/-</sup>→LDLR<sup>-/-</sup> mice (E) Serum triglyceride levels measured in LDLR<sup>-/-</sup>→LDLR<sup>-/-</sup> or hPCSK9tg/LDLR<sup>-/-</sup>→LDLR<sup>-/-</sup> mice (F) Quantitation of proximal lesion area in Oil red O stained proximal aortas of LDLR<sup>-/-</sup>→LDLR<sup>-/-</sup> or hPCSK9tg/LDLR<sup>-/-</sup>→LDLR<sup>-/-</sup> mice.

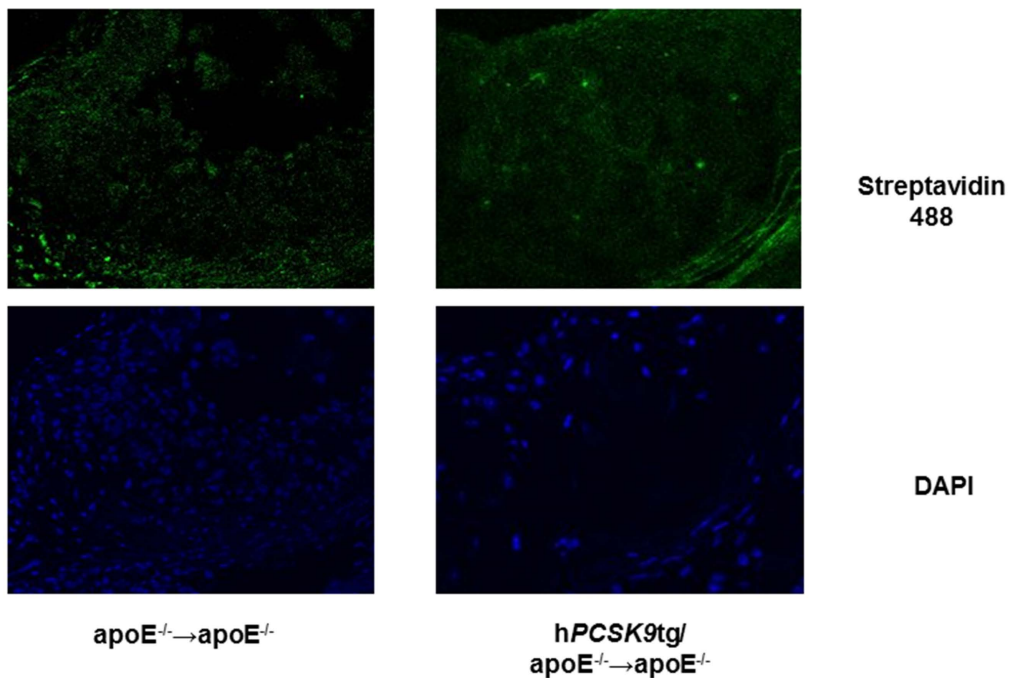

**Supplementary Figure 5.** Representative images showing negative control staining of lesions of proximal aortas in  $apoE^{-/-} \rightarrow apoE^{-/-}$  or  $hPCSK9tg/apoE^{-/-} \rightarrow apoE^{-/-}$  mice. In green: streptavidin 488 antibody staining; in blue: DAPI.

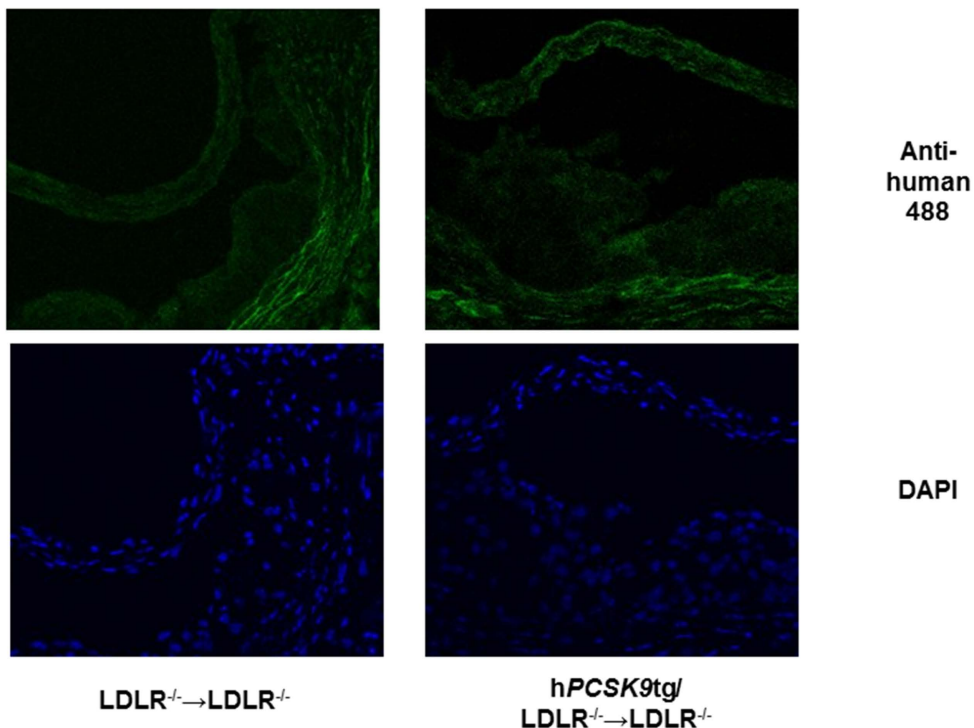

**Supplementary Figure 6.** Representative images showing negative control staining of lesions of proximal aortas in  $LDLR^{-/-} \rightarrow LDLR^{-/-}$  or  $hPCSK9tg/LDLR^{-/-} \rightarrow LDLR^{-/-}$  mice. In green: anti-human secondary antibody staining; in blue: DAPI.

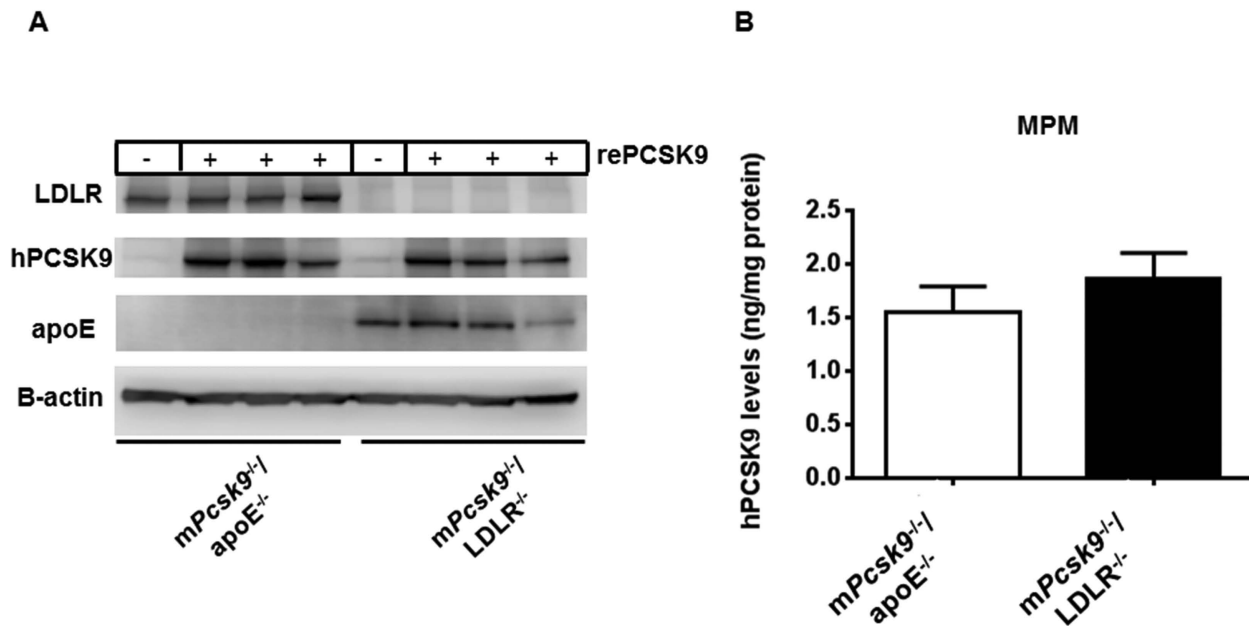

**Supplementary figure 7.** (A) Western blot analysis of hPCSK9, LDLR and apoE in MPM from *mPcsk9<sup>-/-</sup>/LDLR<sup>-/-</sup>* or *mPcsk9<sup>+/-</sup>/apoE<sup>-/-</sup>* mice incubated overnight with recombinant hPCSK9 (rePCSK9) 1000ng/ml (B) Quantification of intracellular levels of hPCSK9 in MPM from *mPcsk9<sup>+/-</sup>/LDLR<sup>-/-</sup>* or *mPcsk9<sup>+/-</sup>/apoE<sup>-/-</sup>* mice incubated overnight with rePCSK9 1000ng/ml.

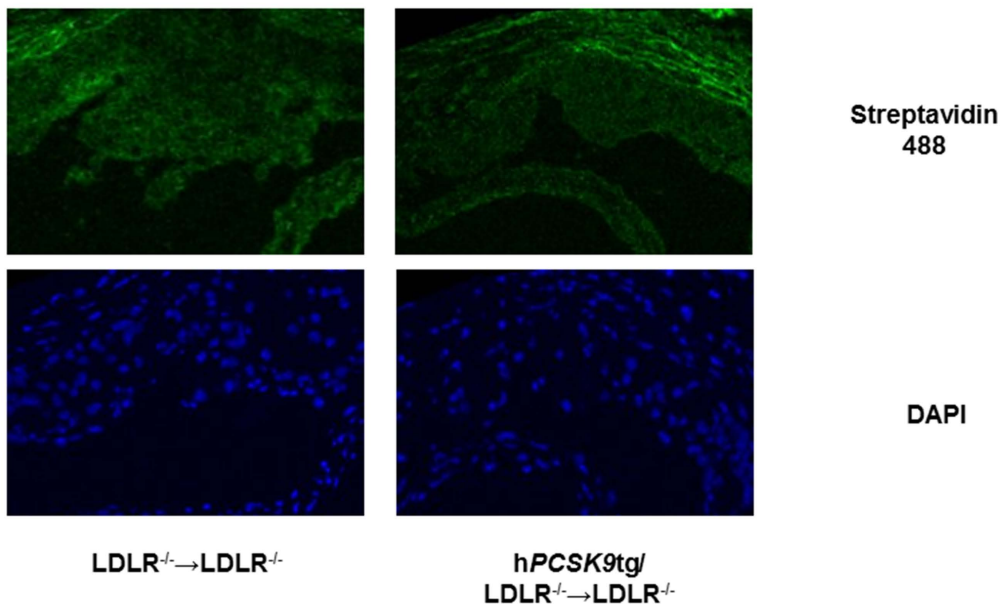

**Supplementary Figure 8.** Representative images showing negative control staining of lesions of proximal aortas in  $LDLR^{-/-} \rightarrow LDLR^{-/-}$  or  $hPCSK9tg / LDLR^{-/-} \rightarrow LDLR^{-/-}$  mice. In green: streptavidin 488 antibody staining; in blue: DAPI.



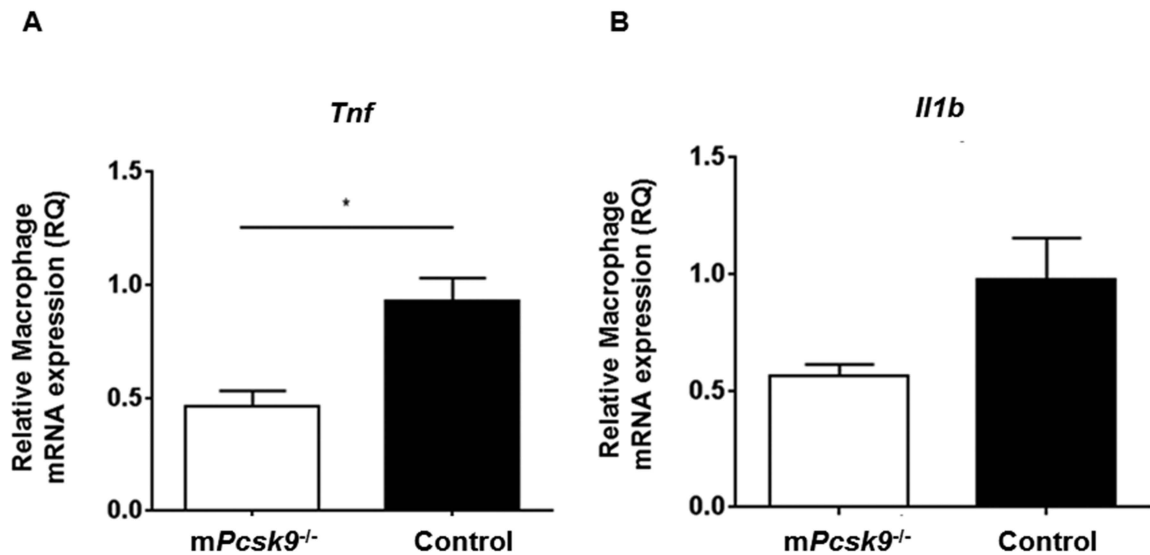

**Supplementary figure 9.** mRNA expression of *Tnf* (A) and *Il1b* (B) in LPS-stimulated MPM from *mPcsk9*<sup>-/-</sup> and Control mice
